# Supplementary material
Source: PubMed Central journal article supplement (PMC2206117)

# Figure-S1

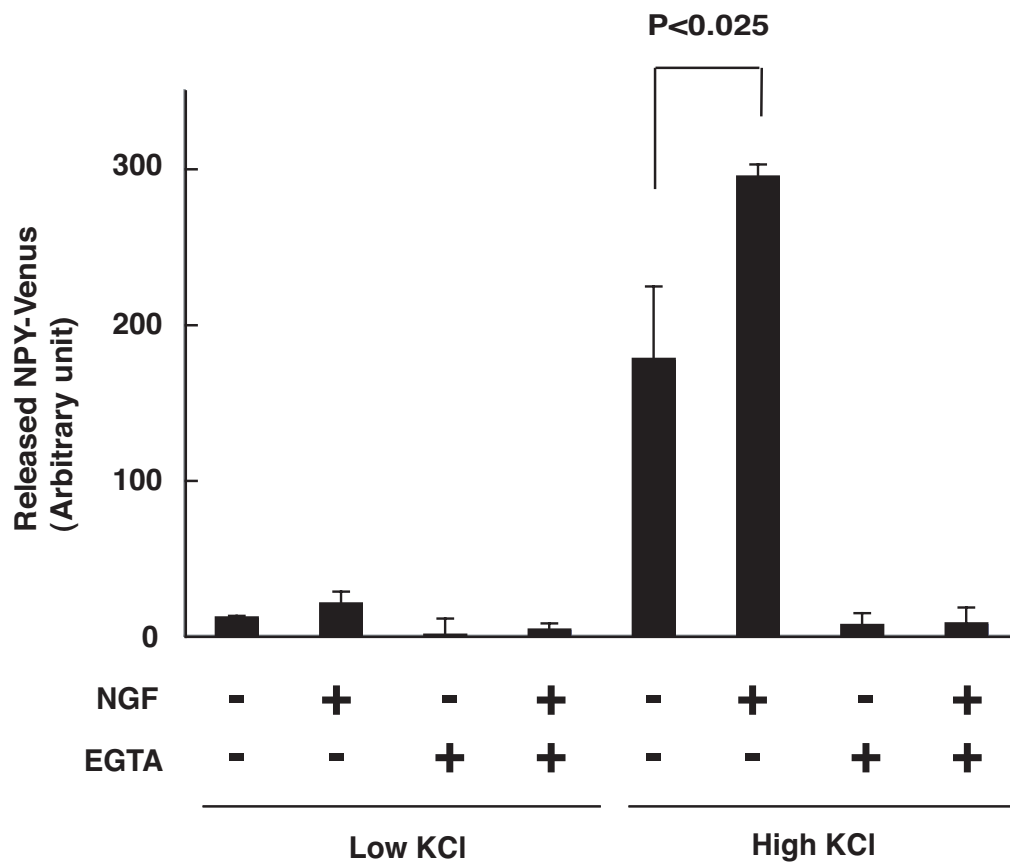

**Figure-S2**

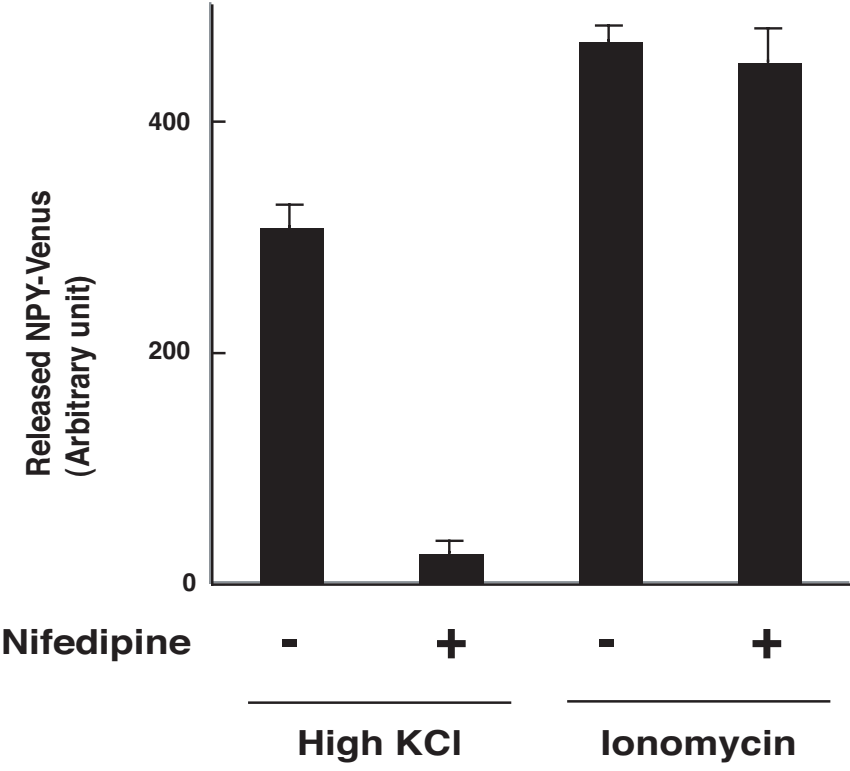

Figure-S3

A

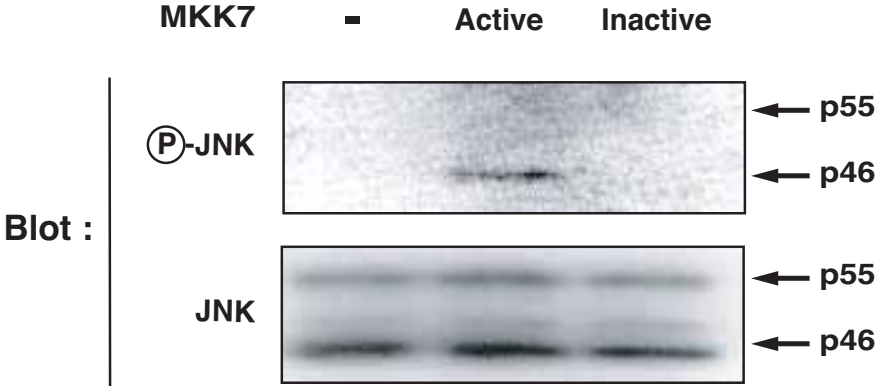

B

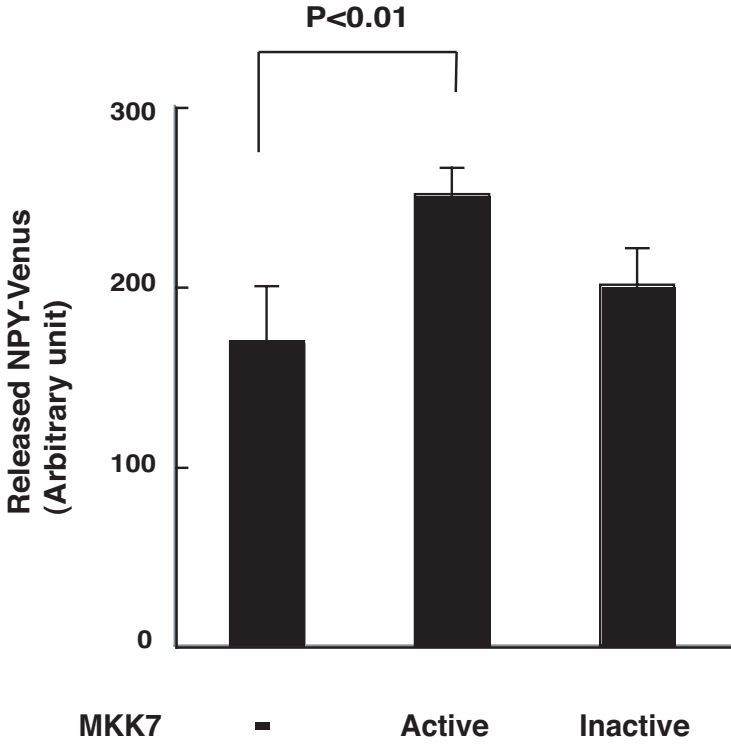

**Figure-S4**

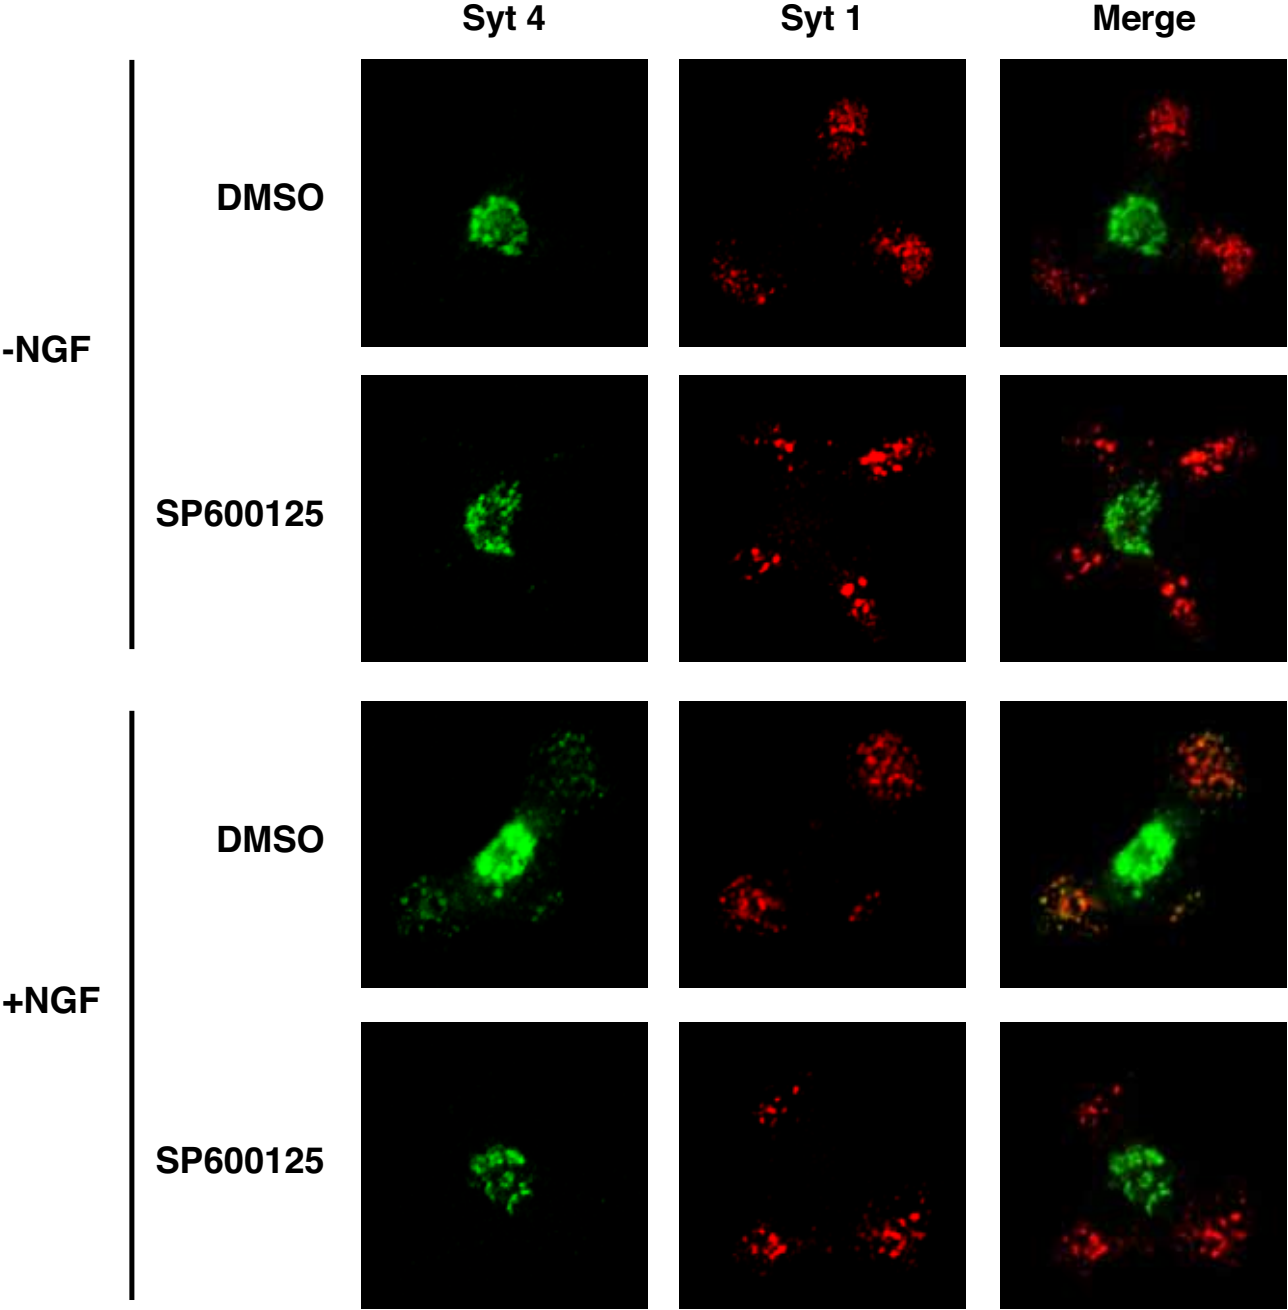

**Figure-S5**

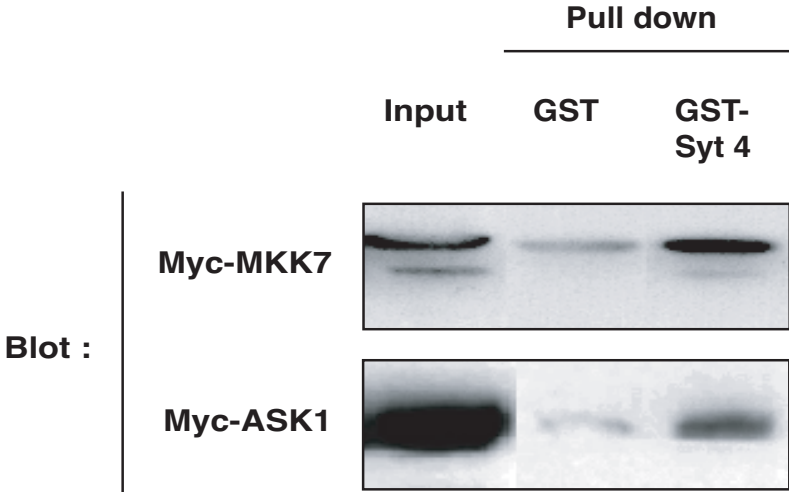

Supplement: 7601935s2.pdf [file 7601935s2.pdf]
